# Supplementary material for: Structural and morphological peculiarities of hybrid Au/nanodiamond engineered nanostructures
Source: PubMed Central journal article supplement (PMC4981890; doi:10.1038/srep31163), 2016-08-12
Supplement: srep31163-s1.pdf [file srep31163-s1.pdf]

***Structural and morphological peculiarities of hybrid Au/nanodiamond  
engineered nanostructures***

***SUPPORTING INFORMATION***

*Roberto Matassa,<sup>†</sup> Silvia Orlanducci,<sup>‡</sup> Giacomo Reina,<sup>‡</sup> Maria Cristina Cassani,<sup>§</sup> Daniele Passeri<sup>†</sup>,  
Maria Letizia Terranova,<sup>‡</sup> and Marco Rossi<sup>\*,†,||</sup>*

<sup>†</sup>Department of Basic and Applied Sciences for Engineering, Sapienza University of Rome, Via Antonio Scarpa 16, 00161 Rome, Italy.

<sup>‡</sup> Department of Chemical Science and Technology-MINIMAlab, University of Rome “Tor Vergata”, Via della Ricerca Scientifica, 00133 Rome, Italy.

<sup>§</sup> Department of Industrial Chemistry ‘Toso Montanari’, University of Bologna, Viale del Risorgimento 4, 40136 Bologna, Italy.

<sup>||</sup>Center for Nanotechnology for Engineering (CNIS), Sapienza University of Rome, P. le A. Moro 5, 00185 Rome, Italy.

## Supporting Information.

**Table S1.** Interplanar spacing (nm) of observed reflections for Au-ND nanocomposite of figure 2b and 3d with  $d_{111}$  of NDIA as standard calibration. Miller indexes and corresponding reference data of Au (card PDF#00-002-1095), ND (card PDF#0675 and reference [A]), and Graphite (card PDF 41-1487).

| $N_{\text{Rings}}$ | Measured | hkl | Gold  | Diamond | hkl | Graphite |
|--------------------|----------|-----|-------|---------|-----|----------|
| 1                  | 0.2362   | 111 | 0.236 | —       | 002 | 3.354    |
| 2                  | 0.2061   | 111 | —     | 0.206   | 100 | 2.131    |
| 3                  | 0.2044   | 200 | 0.204 | —       | 101 | 2.031    |
| 4                  | 0.1740   | 200 | —     | —       | 102 | 1.798    |
| 5                  | 0.1450   | 220 | 0.144 | —       | 004 | 1.677    |
| 6                  | 0.1261   | 220 | —     | 0.126   | 103 | 1.542    |
| 7                  | 0.1231   | 311 | 0.123 | —       | 110 | 1.230    |
| 8                  | 0.1174   | 222 | 0.117 | —       | 112 | 1.155    |
| 9                  | 0.1086   | 311 | —     | 0.108   | 105 | 1.135    |
| 10                 | 0.1036   | 222 | 0.102 | —       | 006 | 1.118    |
| 11                 | 0.0932   | 331 | 0.093 | —       |     |          |
| 12                 | 0.0916   | 420 | 0.091 | —       |     |          |
| 13                 | 0.0893   | 400 | —     | 0.089   |     |          |
| 14                 | 0.0834   | 422 | 0.083 | —       |     |          |
| 15                 | 0.0823   | 313 | —     | 0.082   |     |          |
| 16                 | 0.0802   | 204 | —     | —       |     |          |
| 17                 | 0.0784   | 511 | 0.078 | —       |     |          |
| 18                 | 0.7350   | 224 | —     | 0.073   |     |          |

## High resolution transmission electron microscopy simulations

The multislice method was employed to simulate HREM image of gold nanoparticle. The simulations conditions were referred to the HR-TEM instrument (JEOL JEM-3000F FEG TEM): acceleration voltage 300 kV, spherical aberration of  $C_s=0.6$  mm, three-fold astigmatism of 850 nm, beam divergence of 0.10 mrad and focal spread of 5 nm.

Multislice simulations were conducted for a 15 nm thick gold crystal in [111] zone axis of a supercell of 5x5 unit cells. Defocus series were calculated with an objective aperture of 12.2 mrad setting 2.0 nm defocus step, being the starting defocus around -41.0 nm according to the Scherzer focus parameter of the TEM.

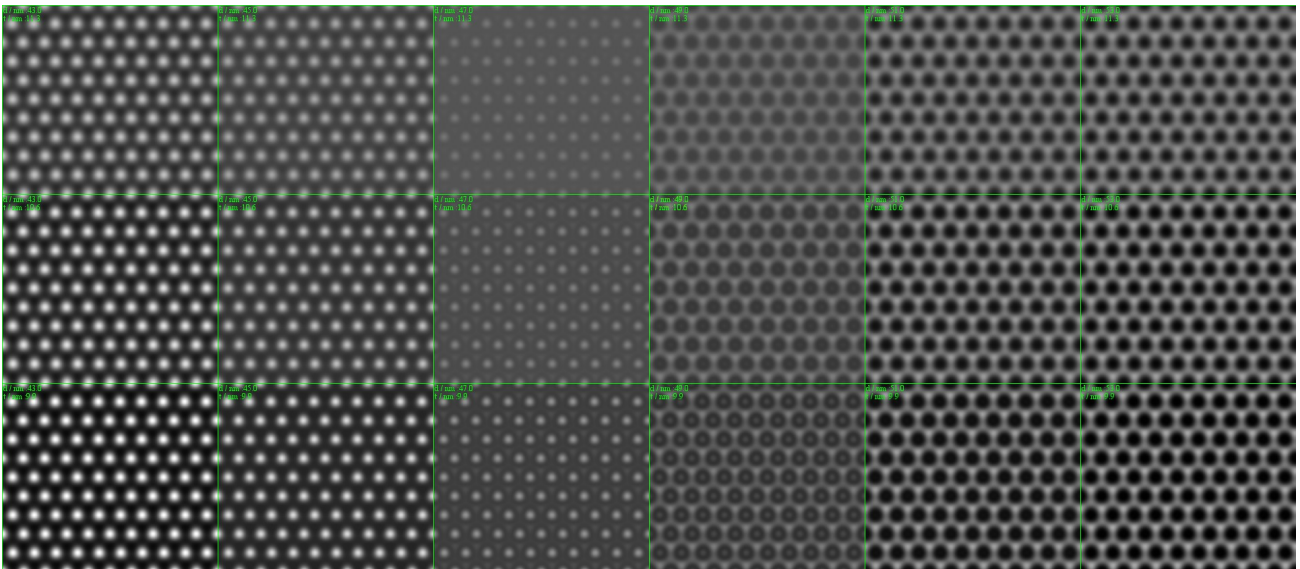

**Figure 1S.** HREM defocus-thickness map image of gold atomic layer.

[A] M. L. Terranova, D. Manno, M. Rossi, A. Serra, E. Filippo, S. Orlanducci, and E. Tamburri, *Cry. Growth Des.*, **2009**, *9*, 1245-1249.

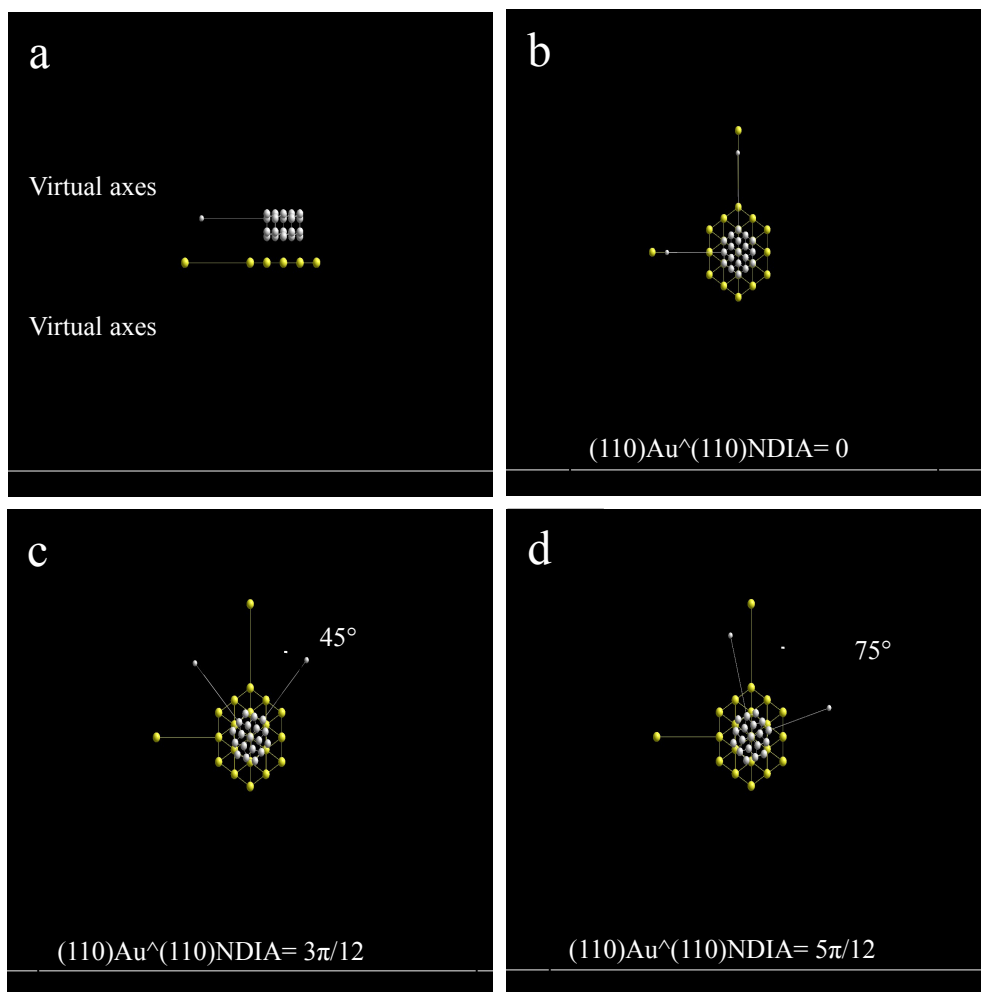

**Figure 2S.** Atomic sketch views of two NDIA layers (white balls) stacked on one gold layer (yellow balls) both oriented along the [111] zone axis. a) Au and NDIA layers separated by non-covalent bonding (Van der Waals interactions). b)  $(110)Au^{(110)NDIA} = 0$  radian. c)  $(110)Au^{(110)NDIA} = 3\pi/12$  radians. d)  $(110)Au^{(110)NDIA} = 5\pi/12$  radians.
